# Supplementary material
Source: Springer Nature journal article supplement (https://www.springermedizin.de/resource/supplementary/12985_2006_139_MOESM3_ESM.pdf/9607344)

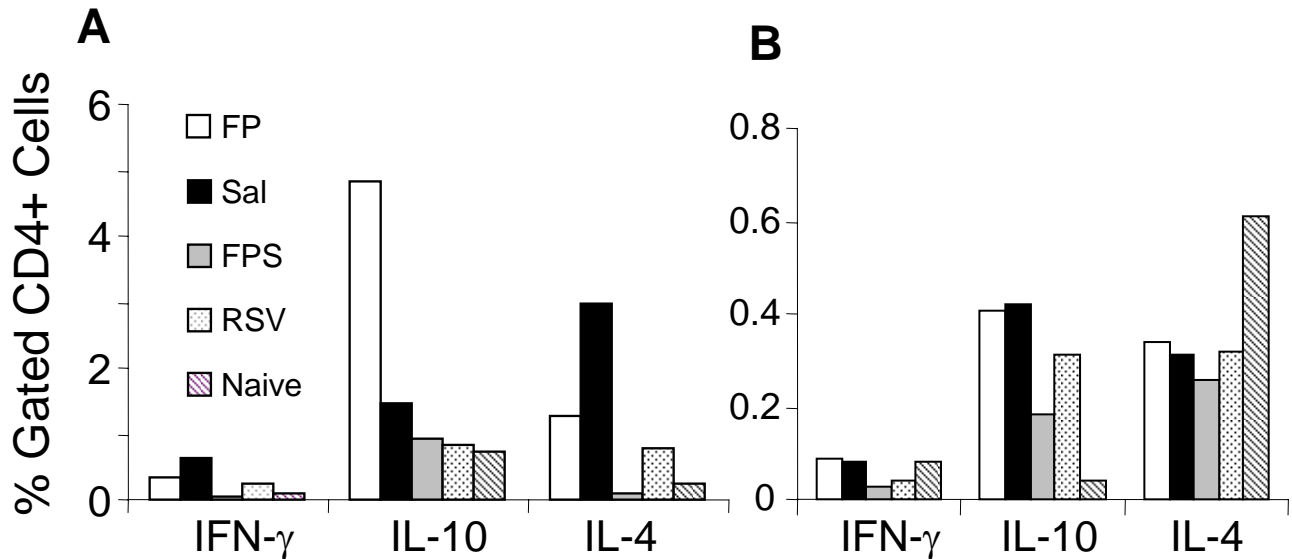

Supplement: MOESM3 [file 9607344]
